# Supplementary material
Source: PubMed Central journal article supplement (PMC4294226)
Supplement: IAI.02763-14_zii999091070so1.pdf [file IAI.02763-14_zii999091070so1.pdf]

## SUPPLEMENTAL MATERIAL

Table S1. Bacterial strains and plasmids used in this study

| Strain or plasmid                                                                      | Genotype and/or phenotype                                                                                                                                                                                                                                                                                           | Source     |
|----------------------------------------------------------------------------------------|---------------------------------------------------------------------------------------------------------------------------------------------------------------------------------------------------------------------------------------------------------------------------------------------------------------------|------------|
| <b>Strains</b>                                                                         |                                                                                                                                                                                                                                                                                                                     |            |
| <i>E. coli</i> Stellar cells                                                           | F-, <i>endA1</i> , <i>supE44</i> , <i>thi-1</i> , <i>recA1</i> , <i>relA1</i> , <i>gyrA96</i> , <i>phoA</i> , $\Phi 80D$ <i>lacZ</i> $\Delta$ <i>M15</i> , $\Delta$ ( <i>lacZYA</i> - <i>argF</i> ) U169, $\Delta$ ( <i>mrr</i> - <i>hsdRMS</i> - <i>mcrBC</i> ), $\Delta$ <i>mcrA</i> , $\lambda$ -                | Clontech   |
| <i>E. coli</i> TOP10                                                                   | F-, <i>mcrA</i> $\Delta$ ( <i>mrr</i> - <i>hsdRMS</i> - <i>mcrBC</i> ), $\phi 80$ <i>lacZ</i> $\Delta$ <i>M15</i> , $\Delta$ <i>lacX74</i> , <i>nupG</i> , <i>recA1</i> , <i>araD139</i> , $\Delta$ ( <i>ara-leu</i> )7697, <i>galE15</i> , <i>galK16</i> , <i>rpsL</i> ( <i>StrR</i> ,) <i>endA1</i> , $\lambda$ - | Invitrogen |
| <i>C. burnetii</i> RSA439                                                              | phase II, clone 4                                                                                                                                                                                                                                                                                                   | (1)        |
| <b>Plasmids for ectopic expression of <i>C. burnetii</i> genes in eukaryotic cells</b> |                                                                                                                                                                                                                                                                                                                     |            |
| pENTR/D-TOPO                                                                           | Gateway entry vector for directional cloning of a blunt-end PCR products                                                                                                                                                                                                                                            | Invitrogen |
| pENTR/N-CBU0021                                                                        | CBU0021 inserted into pENTR/D-TOPO                                                                                                                                                                                                                                                                                  | This study |
| pENTR/N-CBU1556                                                                        | CBU1556 inserted into pENTR/D-TOPO                                                                                                                                                                                                                                                                                  | This study |
| pENTR/N-CBU1818                                                                        | CBU1818 inserted into pENTR/D-TOPO                                                                                                                                                                                                                                                                                  | This study |
| pENTR/N-CBU1863                                                                        | CBU1863 inserted into pENTR/D-TOPO                                                                                                                                                                                                                                                                                  | This study |
| pT-Rex-DEST30/N-mCherry                                                                | Anhydrotetracycline-inducible expression of N-terminal mCherry fusions in mammalian cells; Amp <sup>r</sup>                                                                                                                                                                                                         | (2)        |
| pT-Rex-DEST30/N-GFP                                                                    | Anhydrotetracycline-inducible expression of N-terminal GFP fusions in mammalian cells; Amp <sup>r</sup>                                                                                                                                                                                                             | This study |
| pT-Rex-DEST30/N-GFP-CBU0021                                                            | CBU0021 inserted into pT-Rex-DEST30/N-GFP                                                                                                                                                                                                                                                                           | This study |
| pT-Rex-DEST30/N-mCherry-CBU0021                                                        | CBU0021 inserted into pT-Rex-DEST30/N-mCherry                                                                                                                                                                                                                                                                       | This study |
| pT-Rex-DEST30/N-mCherry-CBUD0487                                                       | CBUD0487 inserted into pT-Rex-DEST30/N-mCherry                                                                                                                                                                                                                                                                      | This study |
| pT-Rex-DEST30/N-GFP-CBU0534                                                            | CBU0534 inserted into pT-Rex-DEST30/N-GFP                                                                                                                                                                                                                                                                           | This study |
| pT-Rex-DEST30/N-mCherry-CBUK0790                                                       | CBUK0790 inserted into pT-Rex-DEST30/N-mCherry                                                                                                                                                                                                                                                                      | This study |
| pT-Rex-DEST30/N-mCherry-CBU0885                                                        | CBU0885 inserted into pT-Rex-DEST30/N-mCherry                                                                                                                                                                                                                                                                       | This study |
| pT-Rex-DEST30/N-GFP-CBUD0886                                                           | CBUD0886 inserted into pT-Rex-DEST30/N-GFP                                                                                                                                                                                                                                                                          | This study |
| pT-Rex-DEST30/N-mCherry-CBU1493                                                        | CBU1493 inserted into pT-Rex-DEST30/N-mCherry                                                                                                                                                                                                                                                                       | This study |
| pT-Rex-DEST30/N-GFP-CBU1543                                                            | CBU1543 inserted into pT-Rex-DEST30/N-GFP                                                                                                                                                                                                                                                                           | This study |
| pT-Rex-DEST30/N-GFP-CBU1556                                                            | CBU1556 inserted into pT-Rex-DEST30/N-GFP                                                                                                                                                                                                                                                                           | This study |
| pT-Rex-DEST30/N-mCherry-CBU1556                                                        | CBU1556 inserted into pT-Rex-DEST30/N-mCherry                                                                                                                                                                                                                                                                       | This study |
| pT-Rex-DEST30/N-mCherry-CBU1676                                                        | CBU1676 inserted into pT-Rex-DEST30/N-mCherry                                                                                                                                                                                                                                                                       | This study |
| pT-Rex-DEST30/N-GFP-CBU1818                                                            | CBU1818 inserted into pT-Rex-DEST30/N-GFP                                                                                                                                                                                                                                                                           | This study |
| pT-Rex-DEST30/N-mCherry-CBU1818                                                        | CBU1818 inserted into pT-Rex-DEST30/N-mCherry                                                                                                                                                                                                                                                                       | This study |
| pT-Rex-DEST30/N-GFP-CBU1863                                                            | CBU1863 inserted into pT-Rex-DEST30/N-GFP                                                                                                                                                                                                                                                                           | This study |
| pT-Rex-DEST30/N-mCherry-CBU1863                                                        | CBU1863 inserted into pT-Rex-DEST30/N-mCherry                                                                                                                                                                                                                                                                       | This study |
| pcDNA 6/TR                                                                             | Constitutively expresses the anhydrotetracycline repressor protein                                                                                                                                                                                                                                                  | Invitrogen |
| <b>Plasmids for targeted gene deletion</b>                                             |                                                                                                                                                                                                                                                                                                                     |            |
| pJC-CAT                                                                                | pJC84 containing <i>cat</i> driven by P1169; Cm <sup>r</sup>                                                                                                                                                                                                                                                        |            |
| pJC-CAT::CBU0021-5'3'                                                                  | 5' and 3' flanking DNA from CBU0021 cloned into pJC-CAT; Cm <sup>r</sup>                                                                                                                                                                                                                                            | This study |
| pJC-CAT::CBU1556-5'3'                                                                  | 5' and 3' flanking DNA from CBU1556 cloned into pJC-CAT; Cm <sup>r</sup>                                                                                                                                                                                                                                            | This study |
| pJC-CAT::CBU1818-5'3'                                                                  | 5' and 3' flanking DNA from CBU1818 cloned into pJC-CAT; Cm <sup>r</sup>                                                                                                                                                                                                                                            | This study |
| pJC-CAT::CBU1863-5'3'                                                                  | 5' and 3' flanking DNA from CBU1863 cloned into pJC-CAT; Cm <sup>r</sup>                                                                                                                                                                                                                                            | This study |
| pJB-Kan                                                                                | pJB2581 containing <i>kan</i> driven by P1169; Kan <sup>r</sup>                                                                                                                                                                                                                                                     | (3)        |
| pJC-CAT::CBU0021-5'3'-Kan                                                              | P1169-Kan cassette cloned into pJC-CAT::CBU0021-5'3'; Cm <sup>r</sup> , Kan <sup>r</sup>                                                                                                                                                                                                                            | This study |
| pJC-CAT::CBU1556-5'3'-Kan                                                              | P1169-Kan cassette cloned into pJC-CAT::CBU1556-5'3'; Cm <sup>r</sup> , Kan <sup>r</sup>                                                                                                                                                                                                                            | This study |

|                                                     |                                                                                                                             |            |
|-----------------------------------------------------|-----------------------------------------------------------------------------------------------------------------------------|------------|
| pJC-CAT::CBU1818-5'3'-Kan                           | P1169-Kan cassette cloned into pJC-CAT::CBU1818-5'3'; Cm <sup>r</sup> , Kan <sup>r</sup>                                    | This study |
| pJC-CAT::CBU1863-5'3'-Kan                           | P1169-Kan cassette cloned into pJC-CAT::CBU1863-5'3'; Cm <sup>r</sup> , Kan <sup>r</sup>                                    | This study |
| pTnS2::P1169- <i>TnsABCD</i>                        | CBU1169 promoter cloned into pTnS2; Amp <sup>r</sup> , R6K ori                                                              | (3)        |
| pMini-Tn7T-CAT                                      | P1169-CAT cloned into pJC18R6K-mini-Tn7T-Gm; Cm <sup>r</sup> , Amp <sup>r</sup> , R6K ori                                   | (3)        |
| pMini-Tn7T-CAT::CBU1818comp                         | CBU1818comp fragment cloned into pMiniTn7T-CAT; Cm <sup>r</sup> , Amp <sup>r</sup>                                          | This study |
| pMini-Tn7T-CAT::CBU1863comp                         | CBU1863comp fragment cloned into pMiniTn7T-CAT; Cm <sup>r</sup> , Amp <sup>r</sup>                                          | This study |
| Plasmids for adenylate cyclase translocation assays |                                                                                                                             |            |
| pJB-CAT-CyaA                                        | Plasmid for expression of N-terminal CyaA fusions in <i>C. burnetii</i> driven by P1169; Cm <sup>r</sup> , Amp <sup>r</sup> | (1)        |
| pJB-CAT-CyaA-CBU0021                                | CBU0021 cloned into pJC-CAT-CyaA                                                                                            | This study |
| pJB-CAT-CyaA-CBUD0487                               | CBUD0487 cloned into pJC-CAT-CyaA                                                                                           | This study |
| pJB-CAT-CyaA-CBU0534                                | CBU0534 cloned into pJC-CAT-CyaA                                                                                            | This study |
| pJB-CAT-CyaA-CBUK0790                               | CBUK0790 cloned into pJC-CAT-CyaA                                                                                           | This study |
| pJB-CAT-CyaA-CBU0885                                | CBU0885 cloned into pJC-CAT-CyaA                                                                                            | This study |
| pJB-CAT-CyaA-CBUD0886                               | CBUD0886 cloned into pJC-CAT-CyaA                                                                                           | This study |
| pJB-CAT-CyaA-CBU1457                                | CBU1457 cloned into pJC-CAT-CyaA                                                                                            | This study |
| pJB-CAT-CyaA-CBU1493                                | CBU1493 cloned into pJC-CAT-CyaA                                                                                            | This study |
| pJB-CAT-CyaA-CBU1543                                | CBU1543 cloned into pJC-CAT-CyaA                                                                                            | This study |
| pJB-CAT-CyaA- CBU1556                               | CBU1556 cloned into pJC-CAT-CyaA                                                                                            | This study |
| pJB-CAT-CyaA- CBU1676                               | CBU1676 cloned into pJC-CAT-CyaA                                                                                            | This study |
| pJB-CAT-CyaA- CBU1818                               | CBU1818 cloned into pJC-CAT-CyaA                                                                                            | This study |
| pJB-CAT-CyaA- CBU1819                               | CBU1819 cloned into pJC-CAT-CyaA                                                                                            | This study |
| pJB-CAT-CyaA- CBU1863                               | CBU1863 cloned into pJC-CAT-CyaA                                                                                            | This study |

---

Table S2. Oligonucleotide primers used in this study

| Primer                           | Sequence (5' to 3')                                       |
|----------------------------------|-----------------------------------------------------------|
| Primers for gene deletion        |                                                           |
| CBU0021-5'-F                     | CGGTACCCGGGGATCCCGATTGCATTAGTCGATTAAC                     |
| CBU0021-5'-R                     | CACCCATATGCGACGCGAGCGTCGAGGTTTATCTCCAGCGCTTTACGCG         |
| CBU0021-3'-F                     | CGTCGCATATGGGTGCGCATGTACGTCTAATTTACTTTAAAAATTTTTTATTGACCG |
| CBU0021-3'-R                     | GAACCTGTTTGTGCGACTCGCGTGAGTCCATCGAAAG                     |
| CBU1556-5'-F                     | CGGTACCCGGGGATCCCGCCGTGGTAAATGACAGG                       |
| CBU1556-5'-R                     | CACCCATATGCGACGCGAGCGTCGAGAAAATACCCTTTTTATTTTCGTTTTCGGCG  |
| CBU1556-3'-F                     | CGTCGCATATGGGTGCGCATGTACGTCAATTTATCCAATCTATTGCTCGCG       |
| CBU1556-3'-R                     | GAACCTGTTTGTGCGACGGAGCAATCACAATGCTGTTAATC                 |
| CBU1818-5'-F                     | CGGTACCCGGGGATCCCATCATCCAGGCTTGAGCGCG                     |
| CBU1818-5'-R                     | GCACCACCGGTGCGAGTCGCCGCAATCTAGACATTTTTAACCTCG             |
| CBU1818-3'-F                     | CGTCGACCGGTGGTGCCGAGGGGAACTAGTCATTTAGGTATTGCAG            |
| CBU1818-3'-R                     | GAACCTGTTTGTGCGACGAACAGCGACCCTGCC                         |
| CBU1863-5'-F                     | CGGTACCCGGGGATCCCTTGAGCGAAGCTATAGAGTG                     |
| CBU1863-5'-R                     | CACCCATATGCGACGCGAGCGACGATTGGGAAGAACTTCCC                 |
| CBU1863-3'-F                     | CGTCGCATATGGGTGCGCATGCTCTGATCCCGCTGCGCAAGCG               |
| CBU1863-3'-R                     | GAACCTGTTTGTGCGACCGAACTTTCGGGACTAATCCCG                   |
| P1169-Kan-NdeI-KO-F              | CGCTCGCGTCGCATATGATGGCTTCGTTTCGCAGCG                      |
| P1169-Kan-NdeI-KO-R              | GCATGCGCACCCATATGTTATCAGAAGAACTCGTCAAGAAGG                |
| P1169-Kan-AgeI-KO-F              | GGCGACGTGACCGGTATGGCTTCGTTTCGCAGCGAACTTGG                 |
| P1169-Kan-AgeI-KO-R              | CCTCGGCACCACCGGTTTATCAGAAGAACTCGTCAAGAAGGC                |
| Primers for gene complementation |                                                           |
| CBU1818comp-F                    | GCTTCTCGAGGAATTCGGCTTAATCAAATTCGATTTG                     |
| CBU1818comp-R                    | TACTCAATGGAATTCCTAGAAAGCCTGGCGGCC                         |
| CBU1863comp-F                    | GCTTCTCGAGGAATTCAGCTCAATAACTCTAATTTTGAG                   |
| CBU1863comp-R                    | TACTCAATGGAATTCCTACGCAGTAAGTGCAGAAGGTACAG                 |
| Primers for Cloning into pENTR   |                                                           |
| pENTR/N- CBU0021-F               | CACCATGAGCAGACAGCCATCATTGACG                              |
| pENTR/N- CBU0021-R               | TCACTTAGTGAAAGAAGCAATGGGC                                 |
| pENTR/N- CBUD0487-F              | CACCATGTTGAGCTCGCCGCATCTGTACTC                            |
| pENTR/N- CBUD0487-R              | TCATAAACGAGGCTTAGGCGCAG                                   |
| pENTR/N- CBU0534-F               | CACCATGATGAGAATCAACGTAGATTCC                              |
| pENTR/N- CBU0534-R               | TCAACGTGGCTGCGGGTTTTG                                     |
| pENTR/N- CBUK0790-F              | CACCATGGCGAGACAACCCAGTGACAGTGATC                          |
| pENTR/N- CBUK0790-R              | TCACGATGCACCAAGACTCTGAAAGCG                               |
| pENTR/N- CBU0885-F               | CACCATGGTTGATTTAAATGATCTTCTCAGAATT                        |
| pENTR/N- CBU0885-R               | TCAACGACTCATTGAACACACGTGC                                 |
| pENTR/N- CBUD0886-F              | CACCATGCCTAAATCTATCAATGAAGC                               |
| pENTR/N- CBUD0886-R              | TCATTGTAACAAACAACAGGTACG                                  |
| pENTR/N- CBU1493-F               | CACCATGGTCAAGCCGAGGATGAC                                  |
| pENTR/N- CBU1493-R               | TCAGGAGCAAGTACAGGTTGTTTTG                                 |
| pENTR/N- CBU1543-F               | CACCATGCAACCCACCGCAGAGACTC                                |
| pENTR/N- CBU1543-R               | TCATTTTCCAAGGGACTCGCTTTG                                  |

|                    |                                |
|--------------------|--------------------------------|
| pENTR/N- CBU1556-F | CACCATGCCTTCTGATAGAAACGGCG     |
| pENTR/N- CBU1556-R | TCAAACGGGAGCATAATTAACCGG       |
| pENTR/N- CBU1676-F | CACCATGCCCAAAATTTACTCATCATTGAC |
| pENTR/N- CBU1676-R | TCACAACCCTCGAGAAAAACGGC        |
| pENTR/N- CBU1818-F | CACCATGTCTAGATTGCCATCCAAAAC    |
| pENTR/N- CBU1818-R | TCAGTTTCCCAGACGCAACG           |
| pENTR/N- CBU1819-F | CACCATGCGTCCAATTCATATGGCTGG    |
| pENTR/N- CBU1819-R | TCAGAAAGCCTGGCGGCC             |
| pENTR/N- CBU1863-F | CACCATGCGAAATGATGATGATACTCATTC |
| pENTR/N- CBU1863-R | TCACGCAGTAAGTGCAGAAGG          |

Primers for cloning into pJB-CAT-CyaA

|                  |                                                          |
|------------------|----------------------------------------------------------|
| CyaA- CBU0021-F  | TTCCGGCTAT <u>GTCGAC</u> ATGAGCAGACAGCCATCATTGACG        |
| CyaA- CBU0021-R  | GCATGCCTCAG <u>TCGACT</u> CACTTAGTGAAAGAAGCAATGGGC       |
| CyaA- CBUD0487-F | TTCCGGCTAT <u>GTCGAC</u> ATGTTGAGCTCGCCGCATCTGTACTC      |
| CyaA- CBUD0487-R | GCATGCCTCAG <u>TCGACT</u> CATAAACGAGGCTTAGGGCGAG         |
| CyaA- CBU0534-F  | TTCCGGCTAT <u>GTCGAC</u> ATGATGAGAATCAACGTAGATTCC        |
| CyaA- CBU0534-R  | GCATGCCTCAG <u>TCGACT</u> CAACGTGGCTGCGGGTTTTG           |
| CyaA- CBUK0790-F | TTCCGGCTAT <u>GTCGAC</u> ATGGCGAGACAACCCAGTGACAGTGATC    |
| CyaA- CBUK0790-R | GCATGCCTCAG <u>TCGACT</u> CACGATGCACCAAGACTCTGAAAGCG     |
| CyaA- CBU0885-F  | TTCCGGCTAT <u>GTCGAC</u> ATGGTTGATTTAAATGATCTTCTCAGAATTC |
| CyaA- CBU0885-R  | GCATGCCTCAG <u>TCGACT</u> CAACGACTCATTGAACACACGTGC       |
| CyaA- CBUD0886-F | TTCCGGCTAT <u>GTCGAC</u> ATGCCTAAATCTATCAATGAAGC         |
| CyaA- CBUD0886-F | GCATGCCTCAG <u>TCGACT</u> CATTGTAACAAACAACAGGTACG        |
| CyaA- CBU1457-F  | TTCCGGCTAT <u>GTCGAC</u> ATGCCTTACCCTTACGAAGCTAAC        |
| CyaA- CBU1457-R  | GCATGCCTCAG <u>TCGACT</u> CATGTTTTTACCCTATCATTACCCAC     |
| CyaA- CBU1493-F  | TTCCGGCTAT <u>GTCGAC</u> ATGGTCAAGCCGCAGGATGAC           |
| CyaA- CBU1493-R  | GCATGCCTCAG <u>TCGACT</u> CAGGAGCAAGTACAGGTTGTTG         |
| CyaA- CBU1543-F  | TTCCGGCTAT <u>GTCGAC</u> ATGCAACCCACCGCAGAGACTC          |
| CyaA- CBU1543-R  | GCATGCCTCAG <u>TCGACT</u> CATTTTCCAAGGGACTCGCTTG         |
| CyaA- CBU1556-F  | TTCCGGCTAT <u>GTCGAC</u> ATGCCTTCTGATAGAAACGGCG          |
| CyaA- CBU1556-R  | GCATGCCTCAG <u>TCGACT</u> CAAACGGGAGCATAATTAACCGG        |
| CyaA- CBU1676-F  | TTCCGGCTAT <u>GTCGAC</u> ATGCCCAAAATTTACTCATCATTGAC      |
| CyaA- CBU1676-R  | GCATGCCTCAG <u>TCGACT</u> CACAACCCTCGAGAAAAACGGC         |
| CyaA- CBU1818-F  | TTCCGGCTAT <u>GTCGAC</u> ATGTCTAGATTGCCATCCAAAAC         |
| CyaA- CBU1818-R  | GCATGCCTCAG <u>TCGACT</u> CAGTTTCCCAGACGCAACG            |
| CyaA- CBU1819-F  | TTCCGGCTAT <u>GTCGAC</u> ATGCGTCCAATTCATATGGCTGG         |
| CyaA- CBU1819-R  | GCATGCCTCAG <u>TCGACT</u> CAGAAAGCCTGGCGGCC              |
| CyaA- CBU1863-F  | TTCCGGCTAT <u>GTCGAC</u> ATGCGAAATGATGATGATACTCATTC      |
| CyaA- CBU1863-R  | GCATGCCTCAG <u>TCGACT</u> CACGCAGTAAGTGCAGAAGG           |

---

<sup>a</sup> The locations of restriction enzyme cut sites are underlined.

Fig. S1. Subcellular localization of Dot/Icm T4BSS substrates in *C. burnetii*-infected HeLa cells. Epifluorescence micrographs of *C. burnetii*-infected HeLa cells ectopically expressing Dot/Icm T4BSS substrates N-terminally fused to GFP or mCherry fluorescent proteins (red). At 72 h post infection, cells were immunostained for LAMP1 (gray) and *C. burnetii* (green). Nucleic acid was stained with DAPI (blue). Scale bar, 10  $\mu$ m.

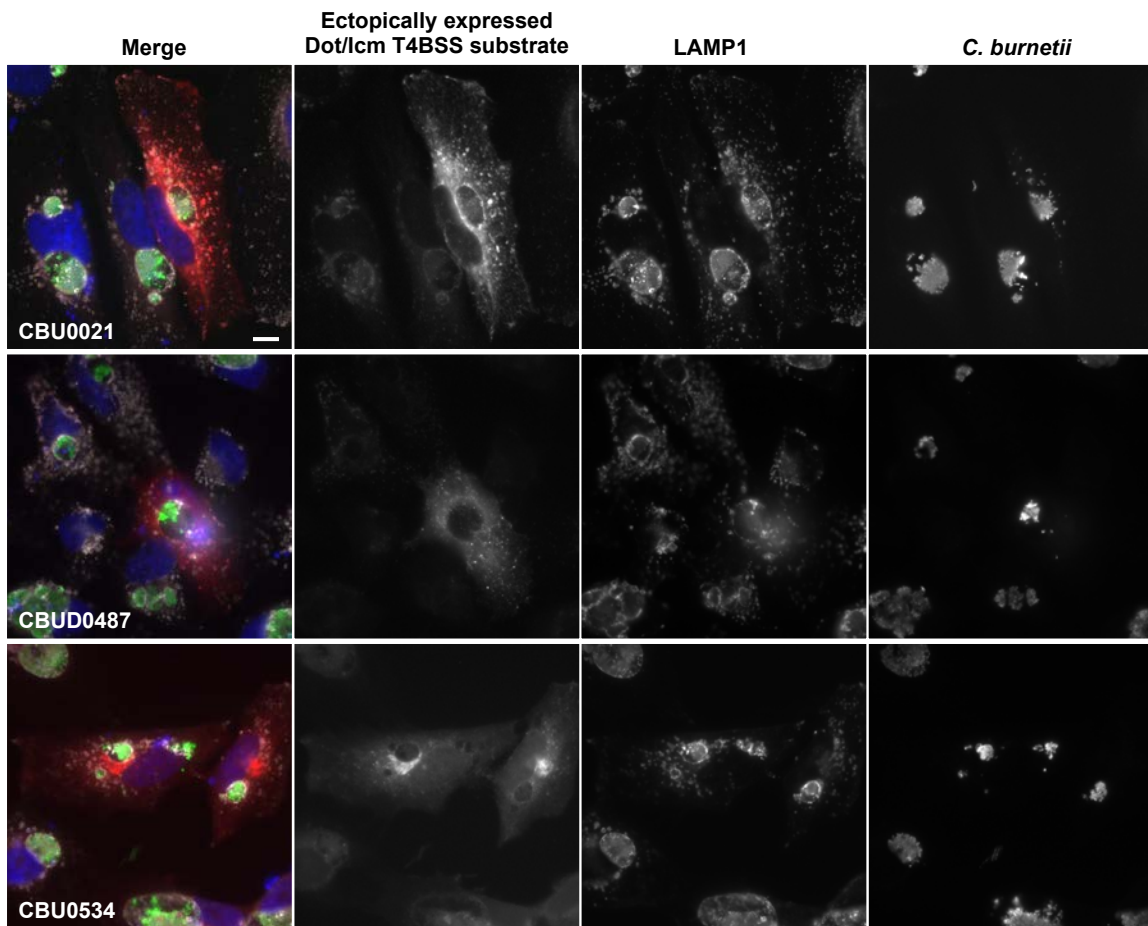

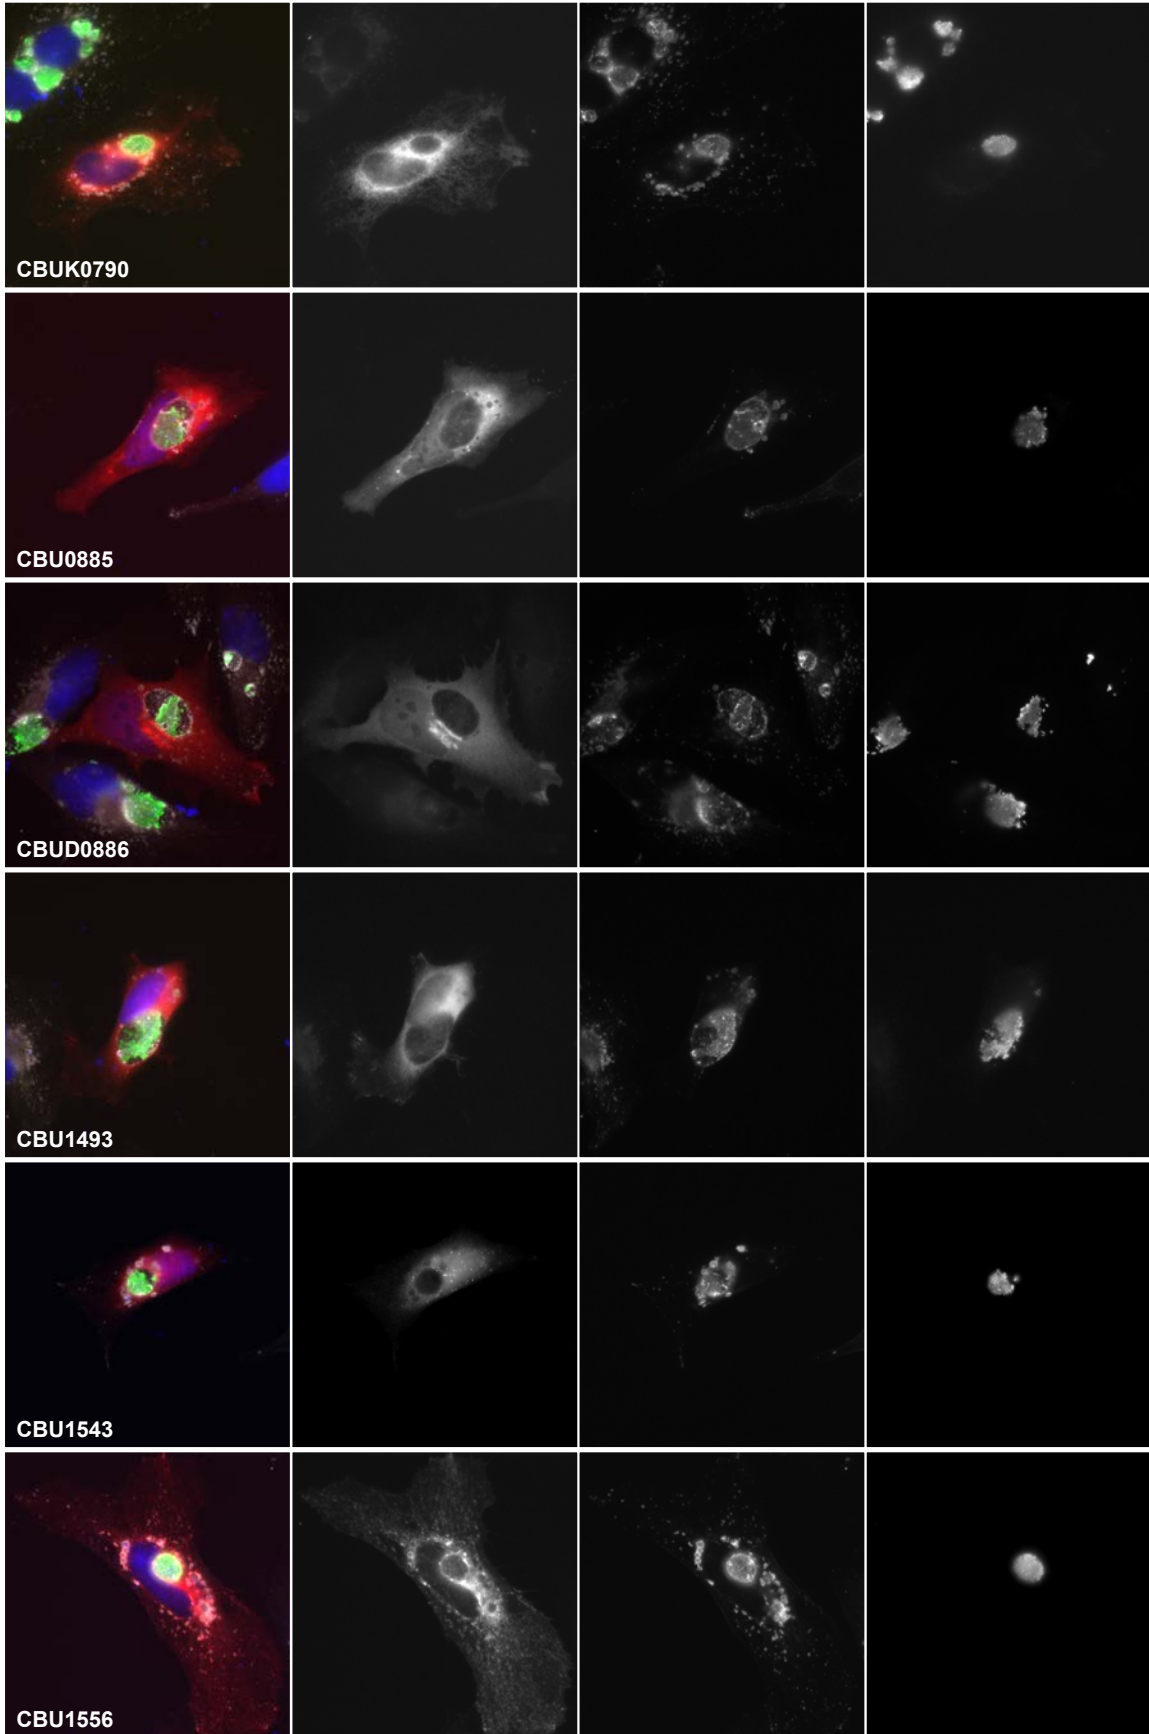

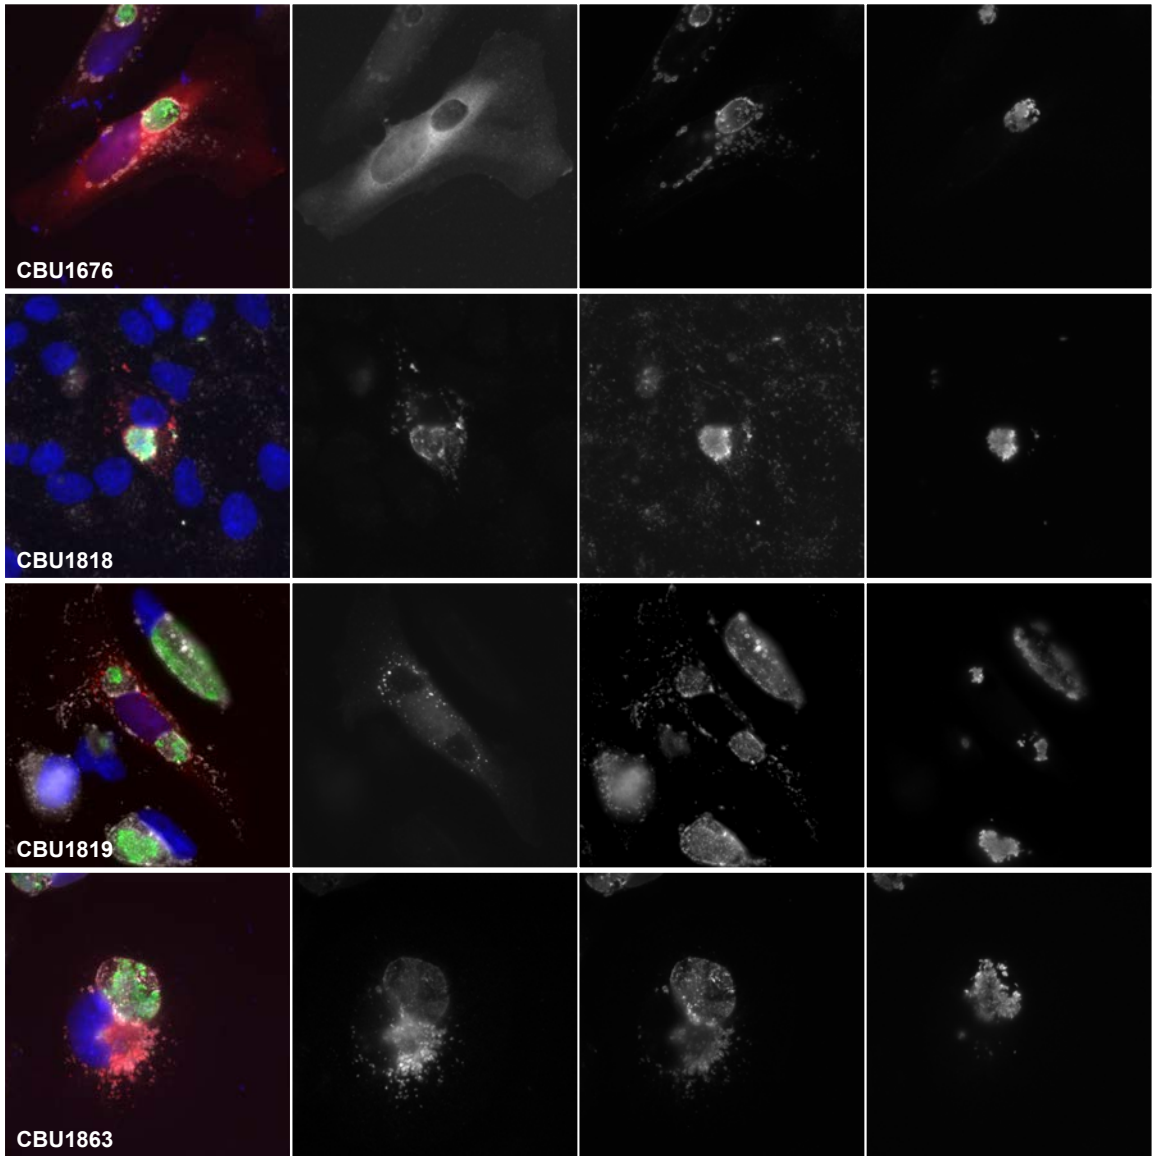

Fig. S2. *C. burnetii* localizes with ectopically expressed Cvp effectors early after infection. Confocal fluorescence micrographs of HeLa cells ectopically expressing CvpB, CvpC, CvpD, or CvpE fused to mCherry fluorescent protein (red). Cells were infected with *C. burnetii* at an MOI of 50 for 6 h, then immunostained with antibodies against LAMP1 (gray) or *C. burnetii* (green). Nucleic acid was stained with DAPI (Blue). Scale bar, 10  $\mu$ m.

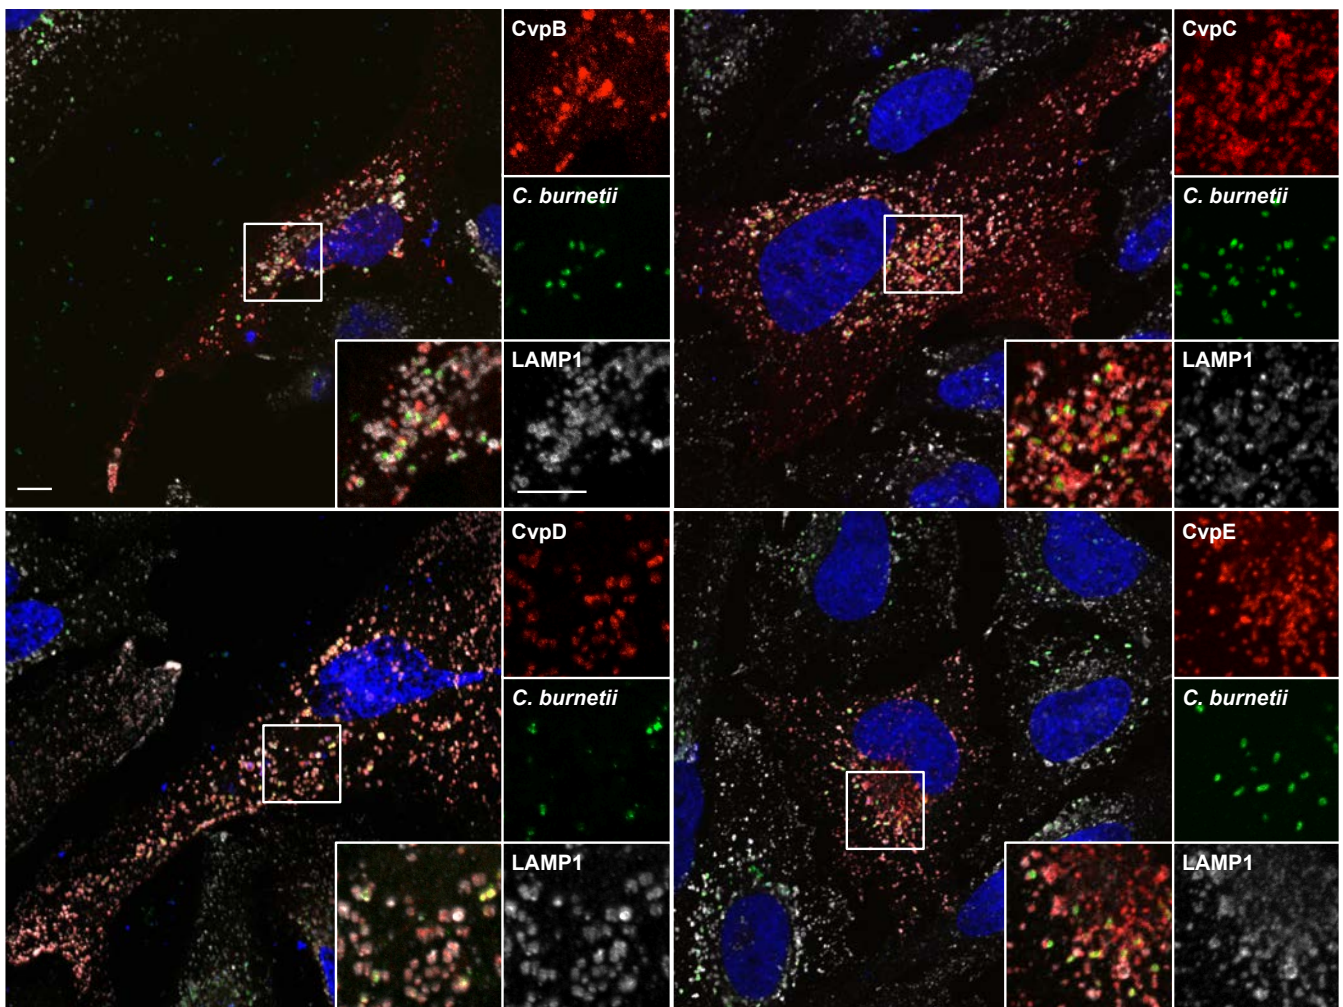



Fig. S3. PV generated by the *C. burnetii*  $\Delta cvp$  mutants acidify, but are deficient in homotypic fusion. Vero cells were infected at an MOI of 100 with wild type *C. burnetii* or the  $\Delta cvp$  mutants, then incubated for six days. (A) *C. burnetii*  $\Delta cvpB$ ,  $\Delta cvpD$ , and  $\Delta cvpE$  exhibit defects in homotypic fusion. The number of PVs in each cell (N = 100) were counted and the mean percentage of cells containing 1, 2, or  $\geq 3$  PV were plotted from three independent experiments. Error bars represent the standard deviation from the means and asterisks indicate a statistically significant difference ( $*P < 0.05$ ,  $**P < 0.01$ ,  $***P < 0.001$ ,  $****P < 0.0001$ ) when compared to values for cells infected with wild type *C. burnetii* as judged by two-way ANOVA. (B) *C. burnetii*  $\Delta cvp$  mutants occupy acidified PV. Cells were incubated with LysoTracker DND-26 (green) prior to immunostaining for LAMP1 (gray) and *C. burnetii* (red). Nucleic acid was stained with DAPI (blue). Shown are maximum intensity projections of z-stacks collected by confocal fluorescence microscopy of each channel and the merged image (Scale bar, 20  $\mu\text{m}$ ).

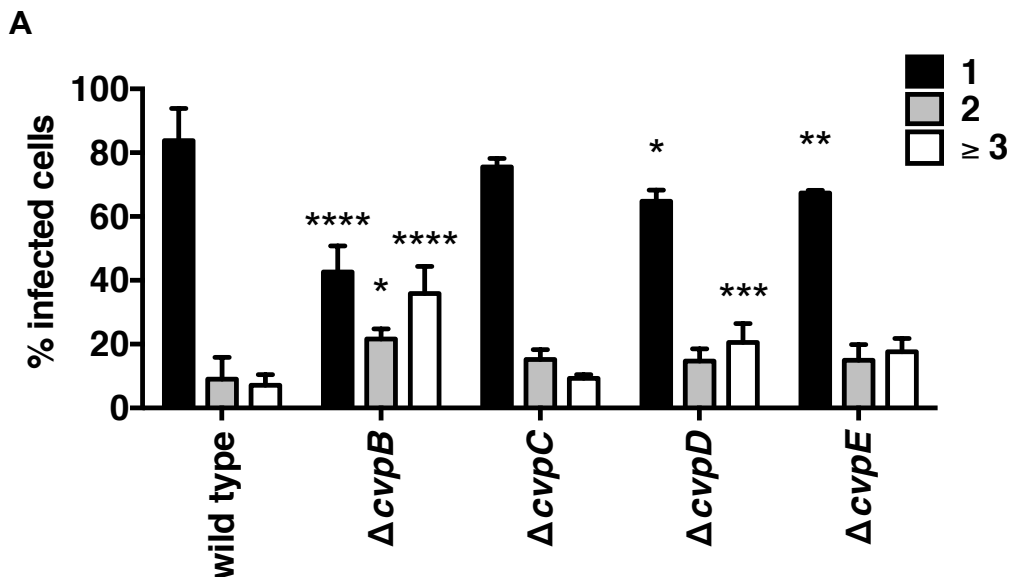

**B**

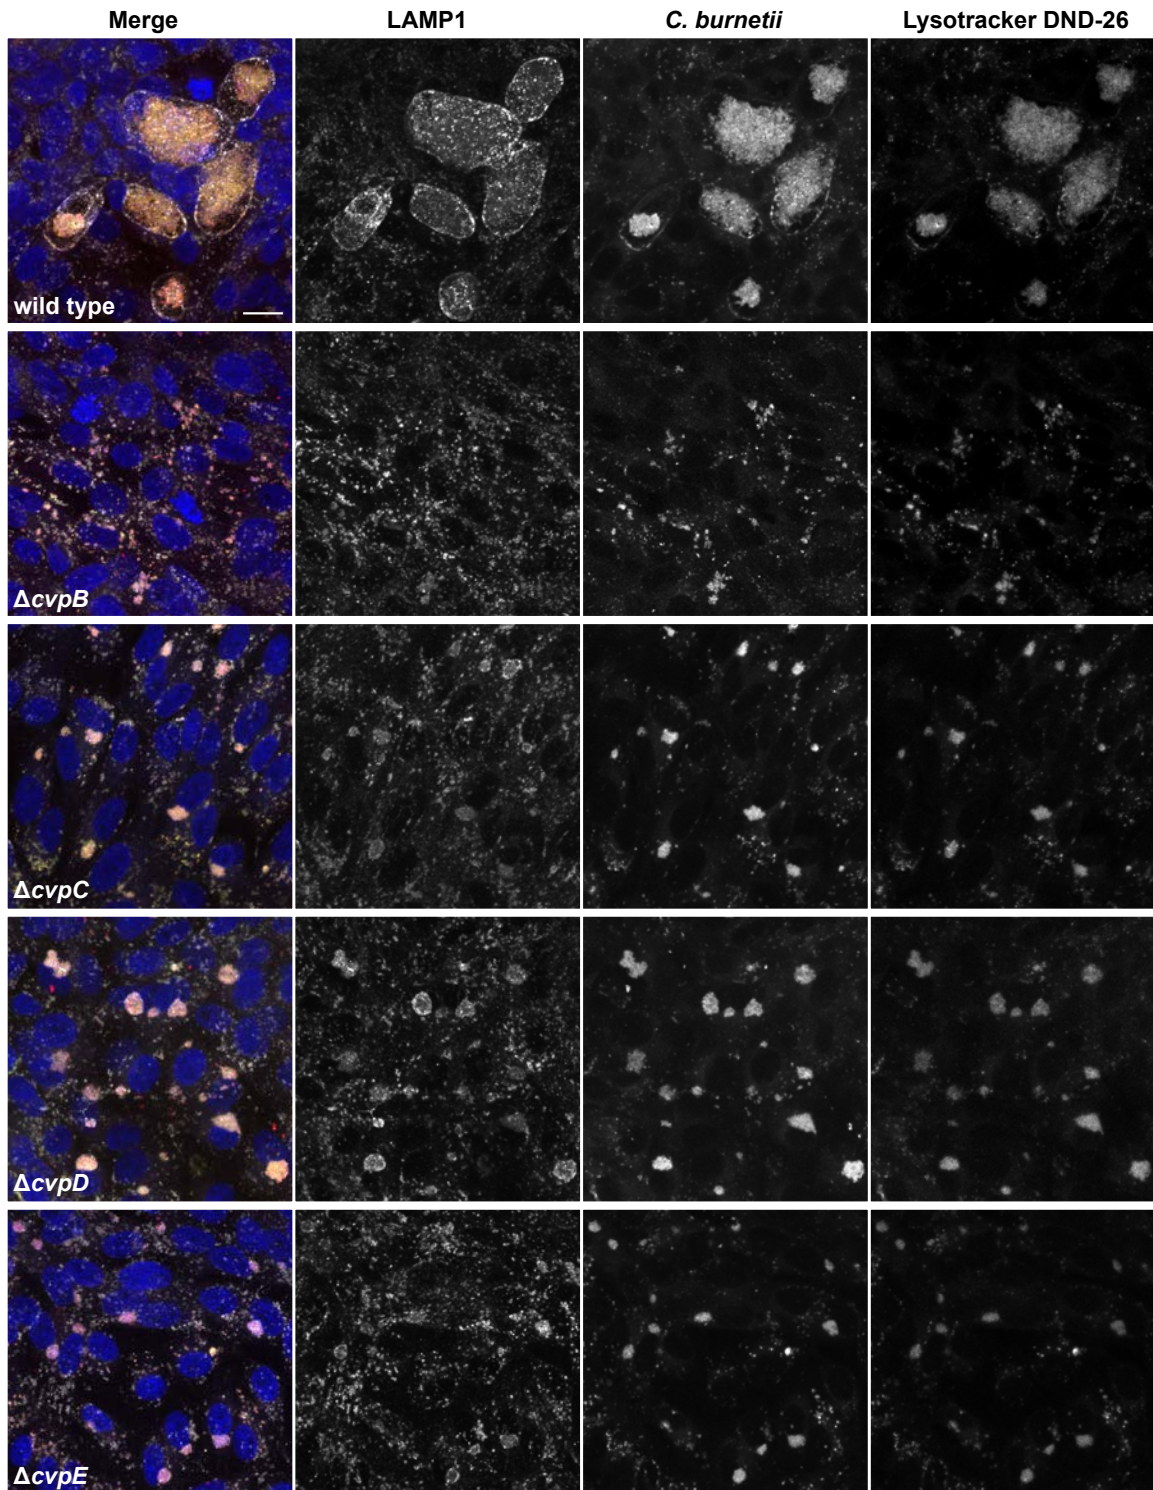

Fig. S4. Cytosolic translocation of a Dot/Icm effector by *C. burnetii*  $\Delta$ cvp mutants. Cellular concentrations of cAMP were determined after infection of THP-1 macrophages for 48 h with wild type *C. burnetii* or the  $\Delta$ cvp mutants expressing a CyaA fusion with the Dot/Icm effector CvpA. Results are expressed as fold change relative to wild type *C. burnetii* expressing CyaA alone from one experiment conducted in duplicate and representative of three independent experiments. Error bars indicate the standard deviation from the means. Asterisks indicates a statistically significant difference ( $P < 0.05$ ) when compared to values for the CyaA alone negative control as judged by one-way ANOVA.

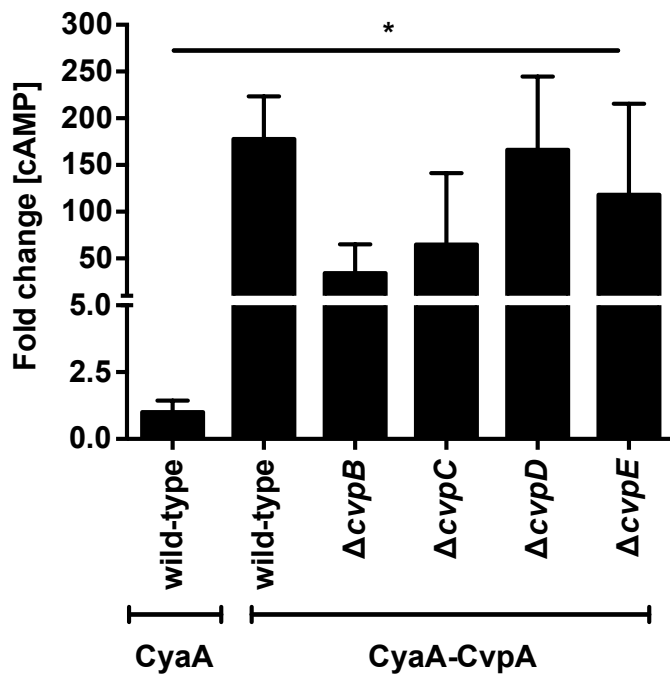

## References

1. **Beare PA, Gilk SD, Larson CL, Hill J, Stead CM, Omsland A, Cockrell DC, Howe D, Voth DE, Heinzen RA.** 2011. Dot/Icm type IVB secretion system requirements for *Coxiella burnetii* growth in human macrophages. *mBio* **2**:e00175-00111.
2. **Larson CL, Beare PA, Howe D, Heinzen RA.** 2013. *Coxiella burnetii* effector protein subverts clathrin-mediated vesicular trafficking for pathogen vacuole biogenesis. *Proc. Natl. Acad. Sci. USA* **110**:E4770-4779.
3. **Beare PA, Larson CL, Gilk SD, Heinzen RA.** 2012. Two systems for targeted gene deletion in *Coxiella burnetii*. *Appl. Environ. Microbiol.* **78**:4580-4589.
